# Supplementary material
Source: PubMed Central journal article supplement (PMC3552881)
Supplement: auto-9-164-s01.pdf [file auto-9-164-s01.pdf]

## **Supplemental Material to:**

**Iryna Monastyrska, Mustafa Ulasli, Peter J.M. Rottier,  
Jun-Lin Guan, Fulvio Reggiori and Cornelis A.M. de Haan**

**An autophagy-independent role for LC3  
in equine arteritis virus replication**

**Autophagy 2012; 9(2)**

**<http://dx.doi.org/10.4161/auto.22743>**

**[www.landesbioscience.com/journals/autophagy/article/22743](http://www.landesbioscience.com/journals/autophagy/article/22743)**

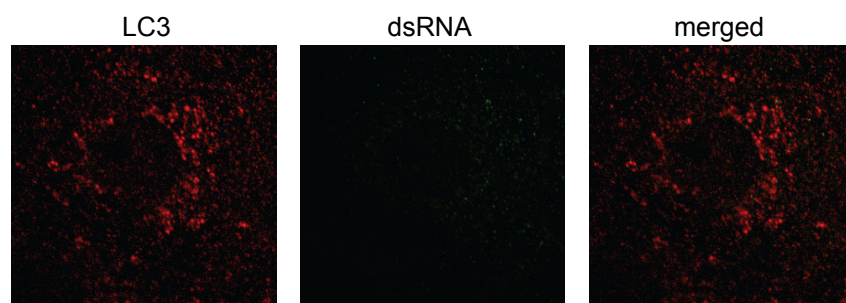

A

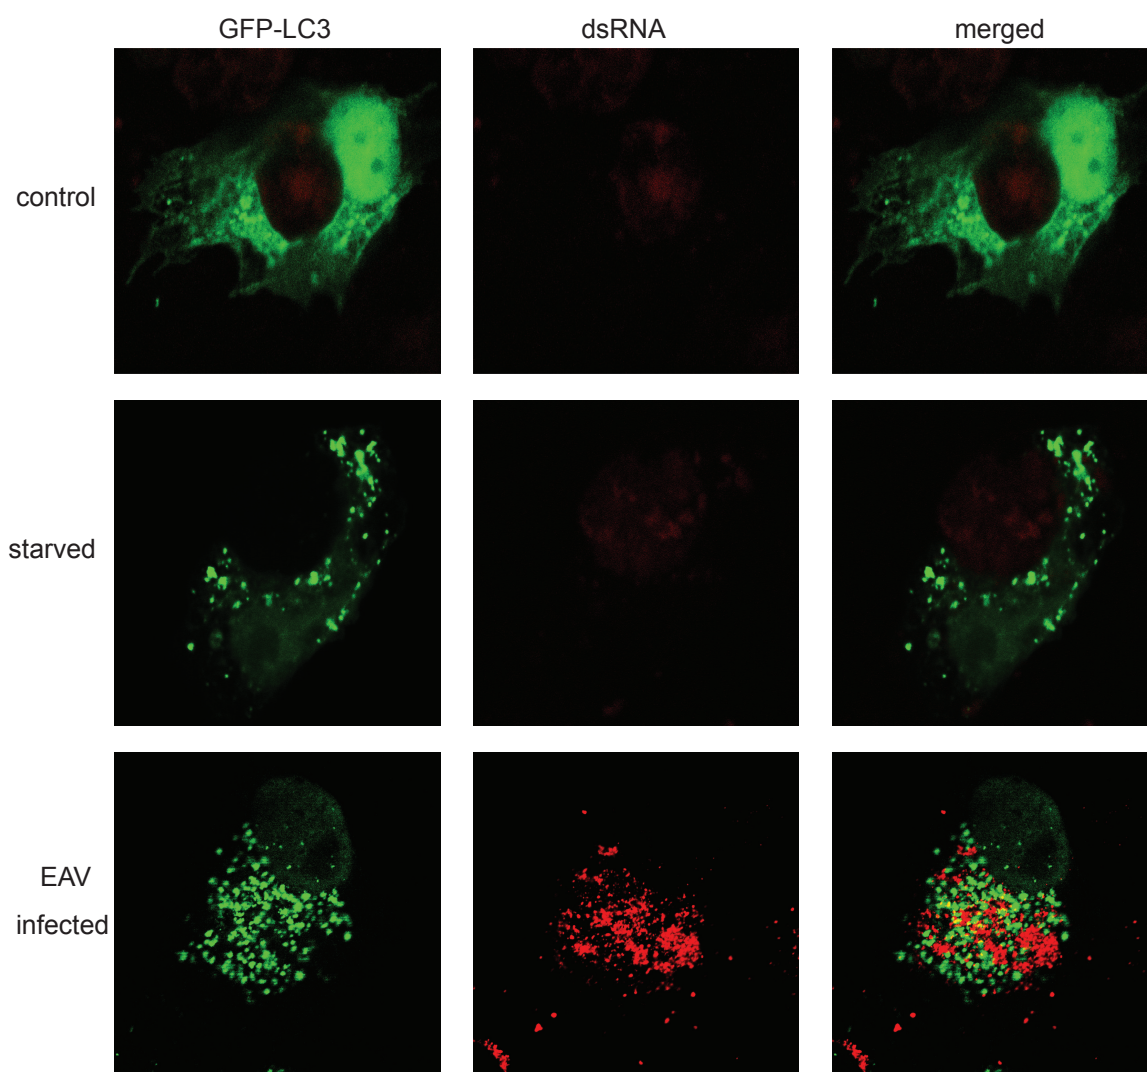

B

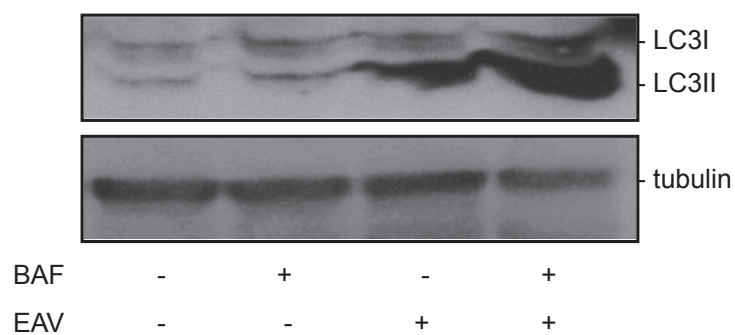

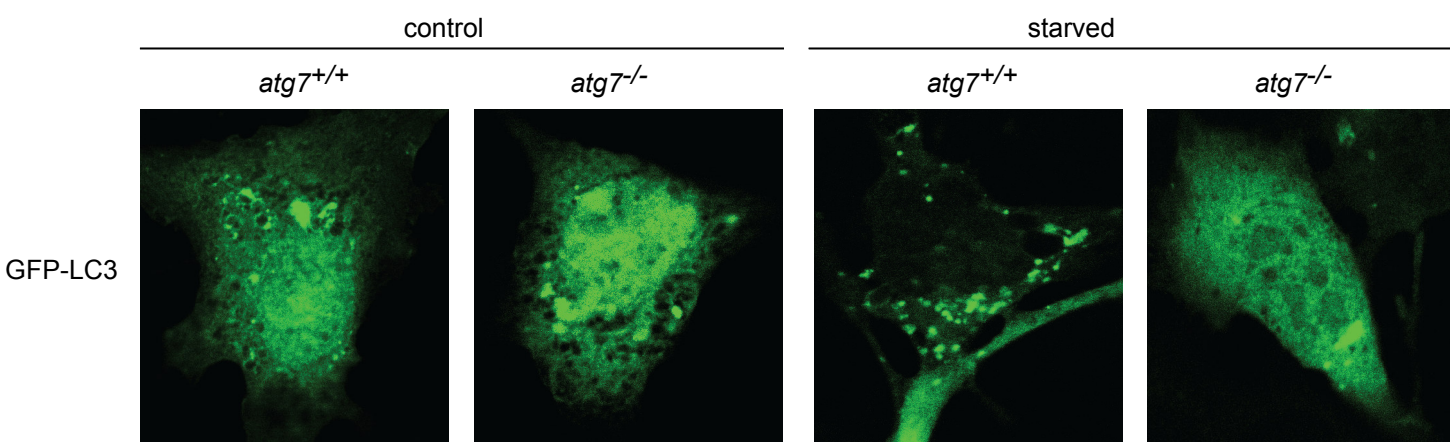

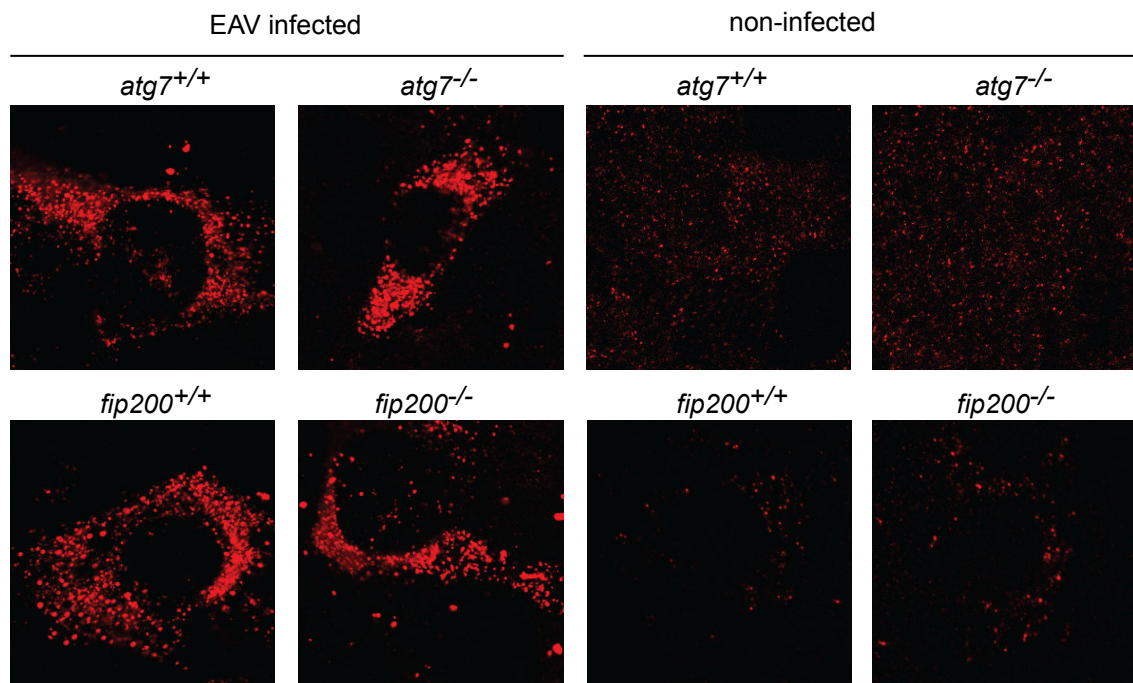

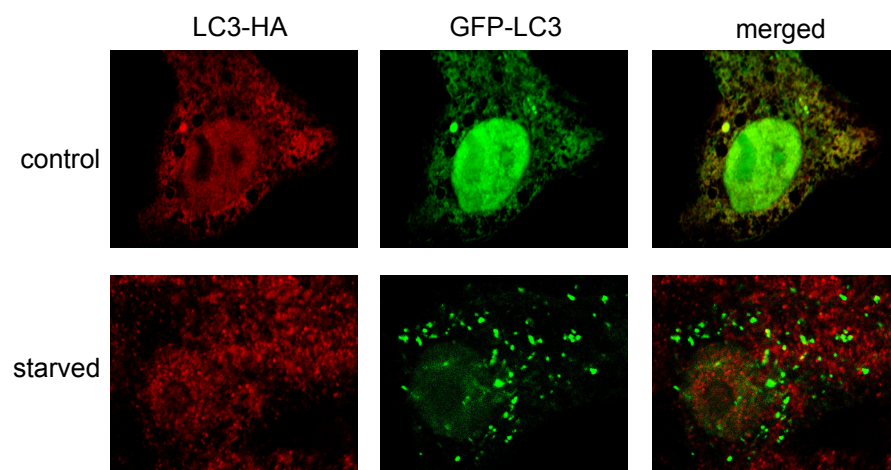

**Figure S1. Control labeling of non-infected cells with antibodies against LC3 and dsRNA.**

Vero E6 cells were fixed and processed for immunofluorescence analysis using LC3- and dsRNA-specific antibodies.

**Figure S2. EAV infection induces autophagy.**

Vero E6 cells were transfected with a plasmid expressing N-terminally GFP-tagged LC3 (GFP-LC3). A. The next day, cells were cultured for 2 h in media with (control) or without (starved) FCS or infected with EAV for 16 h. Cells were subsequently fixed and processed for immunofluorescence analysis using the anti-dsRNA antibody. B. Cells were (mock)-infected with EAV in the absence or presence of bafilomycin A (BAF). After 16 h of infection cells were lysed and processed for Western blot analysis using antibodies against LC3 and tubulin (loading control) .

**Figure S3. Autophagosomes are not formed in Atg7-deficient cells.**

*atg7<sup>+/+</sup>* and *atg7<sup>-/-</sup>* MEFs were transfected with a plasmid expressing N-terminally GFP-tagged LC3 (GFP-LC3). The next day, cells were cultured for 2 h in media with (control) or without (starved) FCS. Cells were subsequently fixed and processed for immunofluorescence analysis.

**Figure S4. EAV replication does not require the Atg5/Atg7-independent autophagy.**

*atg7<sup>+/+</sup>* , *atg7<sup>-/-</sup>* , *fip200<sup>+/+</sup>* and *fip200<sup>-/-</sup>* MEFs were (mock-) infected with EAV for 16 h and processed for immunofluorescence analysis using antibodies against dsRNA.

**Figure S5. Non-lipidated LC3-I does not associate with autophagosomes.**

Vero E6 cells were transfected with the plasmids expressing either C-terminally HA-tagged non-lipidated LC3-I (LC3-HA) or N-terminally GFP-tagged LC3 (GFP-LC3). The next day, cells were cultured for 2 h in media with (control) or without (starved) FCS and subsequently processed for immunofluorescence analysis.
